# Supplementary material for: Combining Multiple Magnetic Resonance Imaging Sequences Provides Independent Reproducible Radiomics Features
Source: PubMed Central journal article supplement (PMC6376058; doi:10.1038/s41598-018-37984-8), 2019-02-14
Supplement: 41598_2018_37984_MOESM1_ESM.pdf [file 41598_2018_37984_MOESM1_ESM.pdf]

# Combining Multiple Magnetic Resonance Imaging Sequences

## Provides Independent Reproducible Radiomics Features

A.Lecler\*, MD, PhD<sup>2</sup>; L.Duron\*, MD, MSc<sup>1,2</sup>; D.Balvay<sup>2</sup>, PhD; J.Savatovsky, MD<sup>1</sup>; O.Bergès, MD<sup>1</sup>; M. Zmuda, MD<sup>3</sup>; E.Farah, MD<sup>3</sup>; O.Galatoire, MD<sup>3</sup>; A.Bouchouicha, PhD<sup>2</sup>; L.S.Fournier, MD, PhD<sup>2,4</sup>

\*These authors contributed equally to the work

1. Department of Radiology, Fondation Ophtalmologique Adolphe de Rothschild, Paris, France
2. Université Paris Descartes Sorbonne Paris Cité, INSERM UMR-S970, Cardiovascular Research Center - PARCC, Paris, France
3. Department of Orbitopalpebral Surgery, Fondation Ophtalmologique Adolphe de Rothschild, Paris, France
4. Sorbonne Paris Cité University, Paris Université Paris Descartes Sorbonne Paris Cité, Assistance Publique-Hôpitaux de Paris, Hôpital Européen Georges Pompidou, Radiology Department, Paris, France

### Corresponding author:

Augustin Lecler, MD

Department of Radiology, Fondation Ophtalmologique A. de Rothschild

29 rue Manin, 75019 Paris, France

E-mail: alecler@for.paris

Phone: +00 33 1 48 03 64 01 Fax : +00 33 1 48 03 65 01

## Supplementary Figures

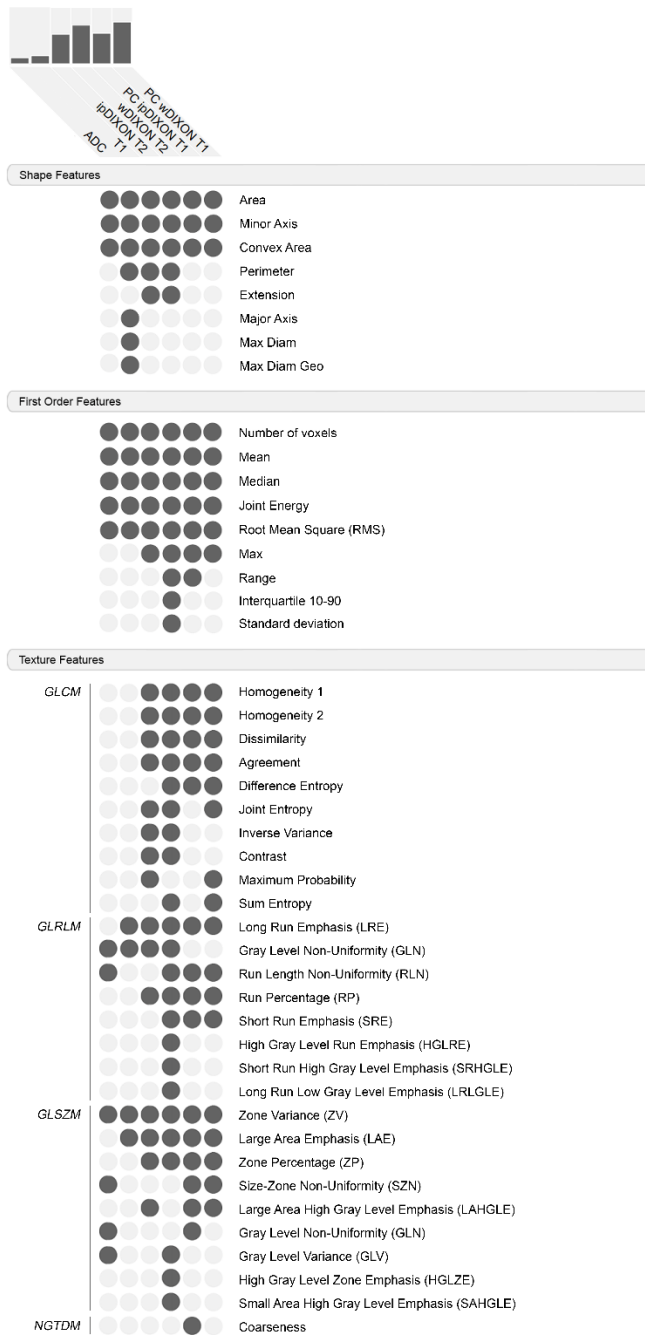

**Supplementary Figure 1. Details of reproducible features extracted after the step one.**

Each MR sequence is displayed in a column. Each row displays a distinct feature. Features issued from the same categories (shape, first-order or texture) are grouped. A black point indicates a reproducible feature. Apparent Diffusion Coefficient map (ADC); Post-contrast in-phase DIXON T1 (PC ipDIXON T1); Post-contrast water DIXON T1 (PC wDIXON T1);

In-phase DIXON T2 (ipDIXON T2); Water DIXON T2 (wDIXON T2); grey-level co-occurrence (GLCM), grey-level run-length (GLRLM), grey-level size-zone (GLSZM), neighborhood grey-tone difference (NGTDM).

Dendrogram / Cut-off = Spearman < 0.9 (Dissimilarity > 0.1)

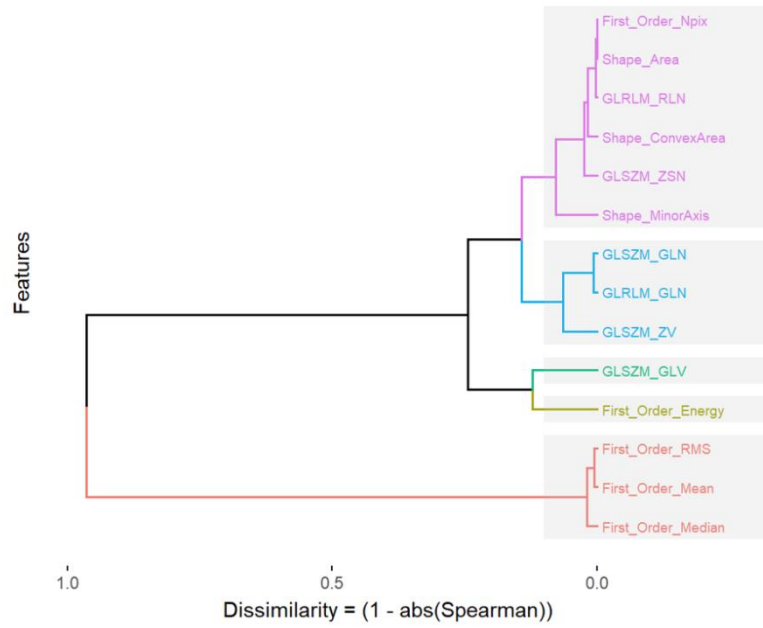

### Correlogram of Spearman's correlations

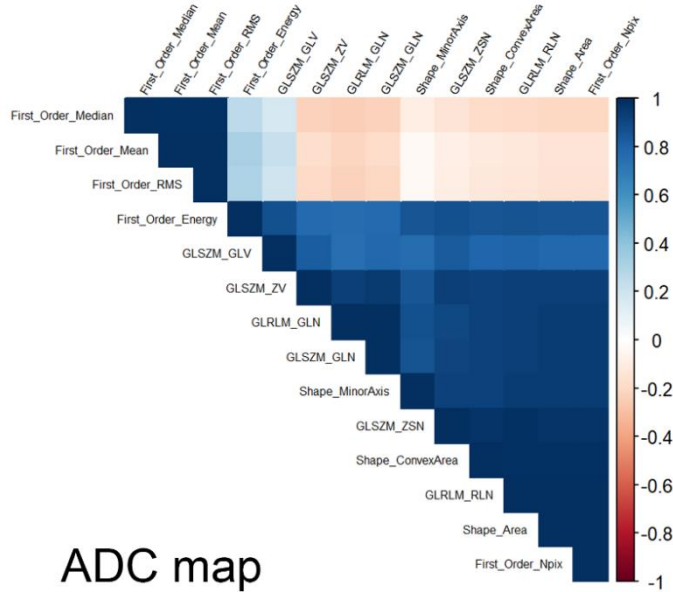

Dendrogram / Cut-off = Spearman < 0.9 (Dissimilarity > 0.1)

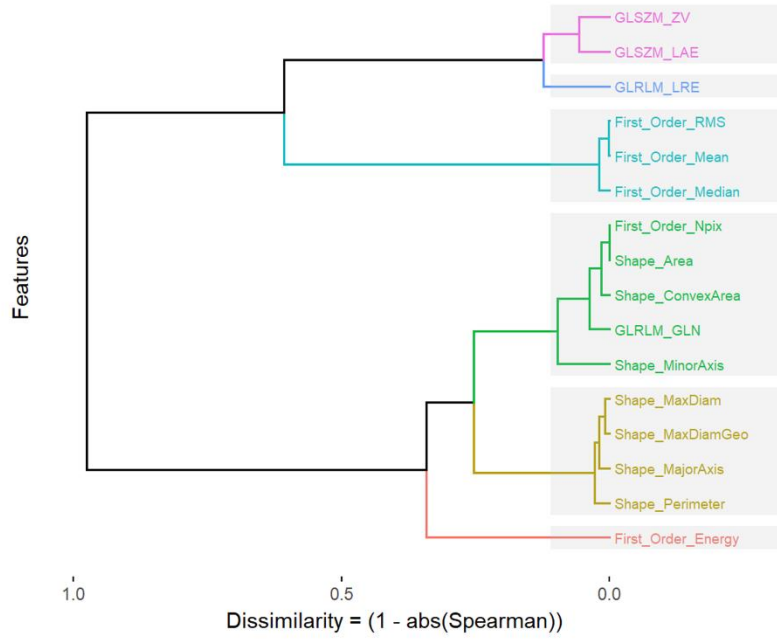

### Correlogram of Spearman's correlations

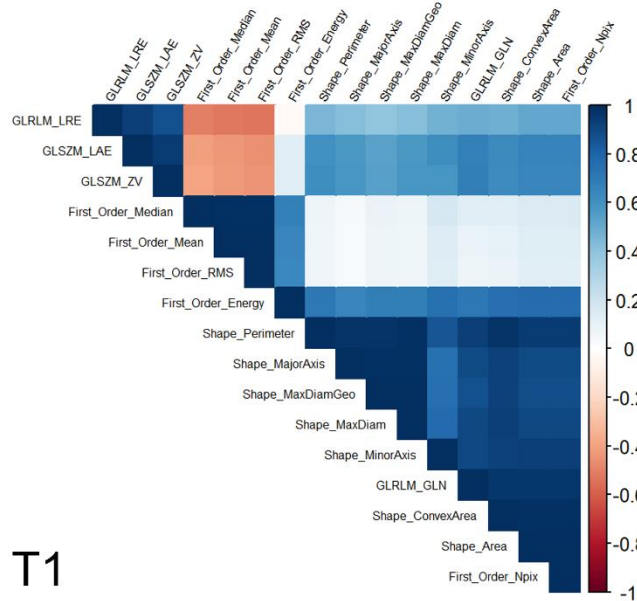

T1

Dendrogram / Cut-off = Spearman < 0.9 (Dissimilarity > 0.1)

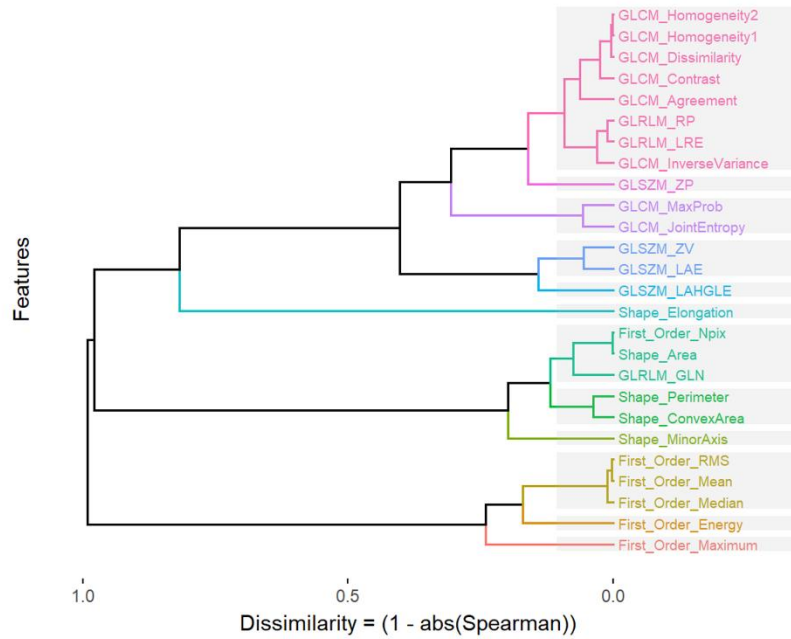

### Correlogram of Spearman's correlations

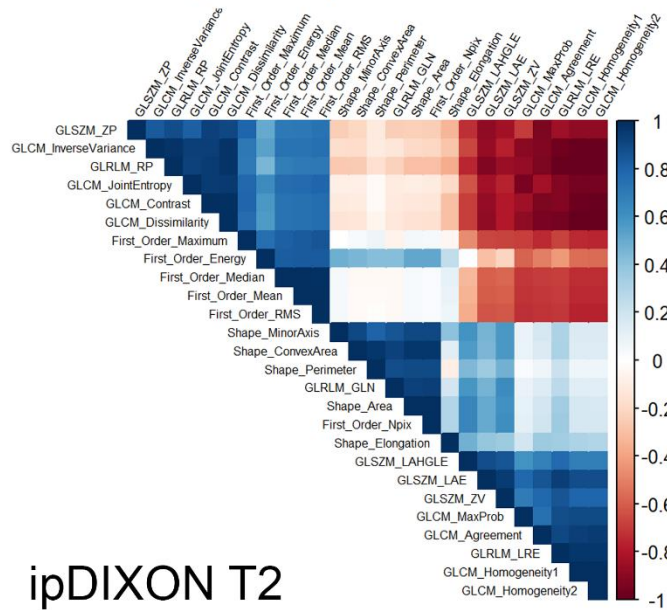

ipDIXON T2

Dendrogram / Cut-off = Spearman < 0.9 (Dissimilarity > 0.1)

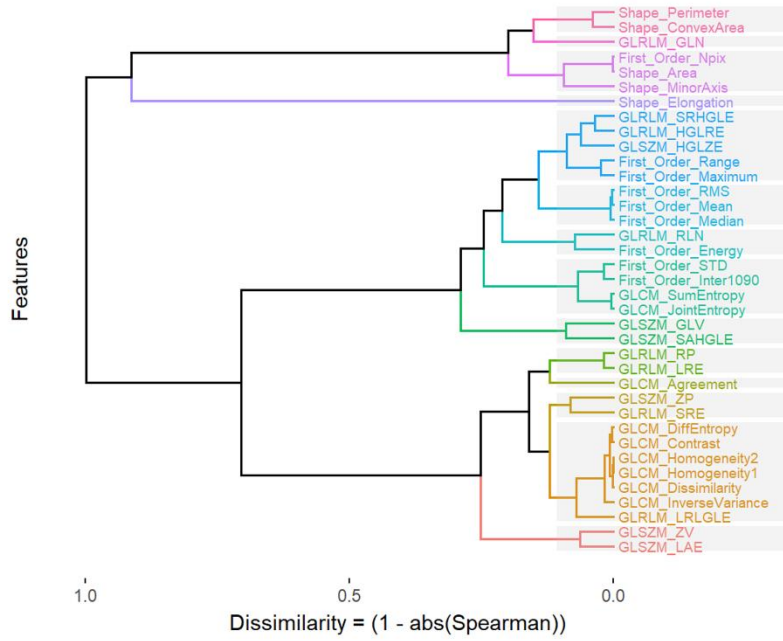

Correlogram of Spearman's correlations

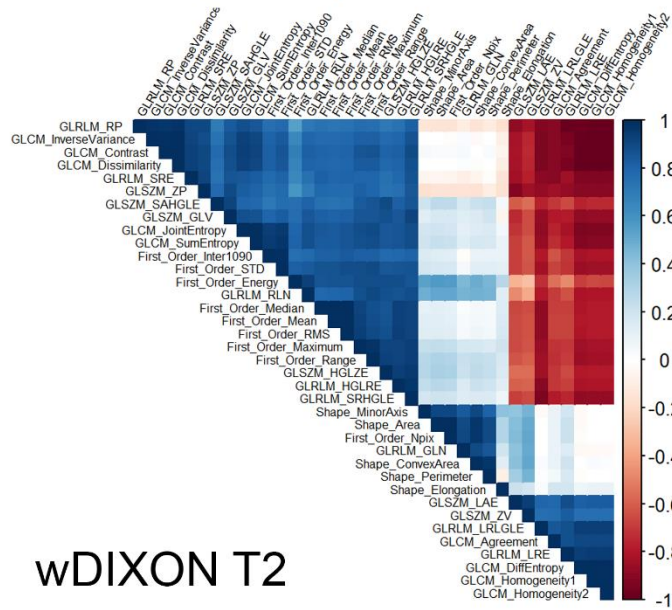

Dendrogram / Cut-off = Spearman < 0.9 (Dissimilarity > 0.1)

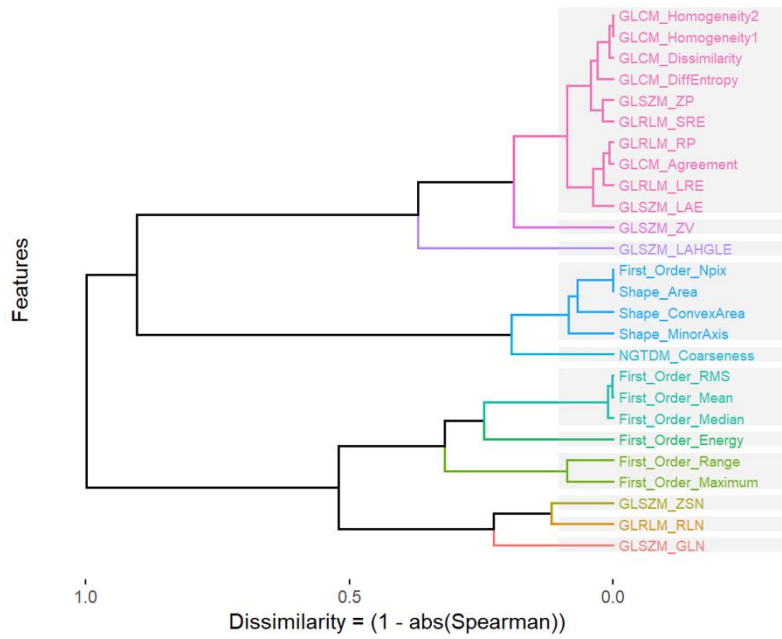

### Correlogram of Spearman's correlations

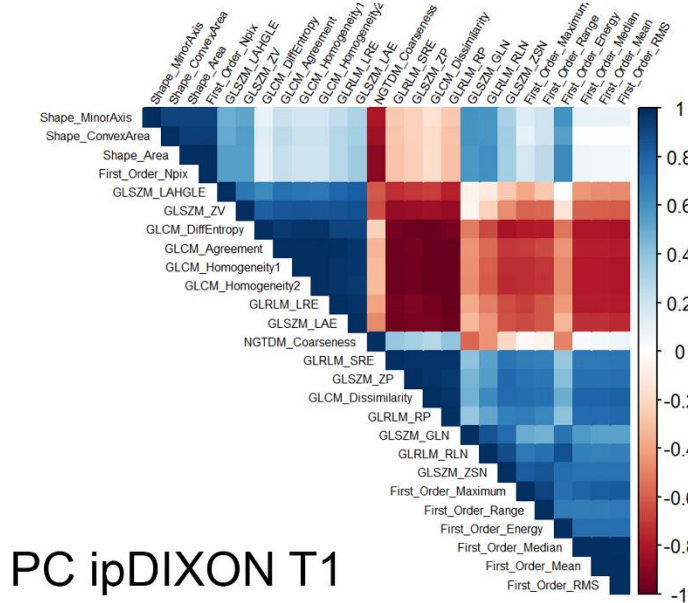

PC ipDIXON T1



Dendrogram / Cut-off = Spearman < 0.9 (Dissimilarity > 0.1)

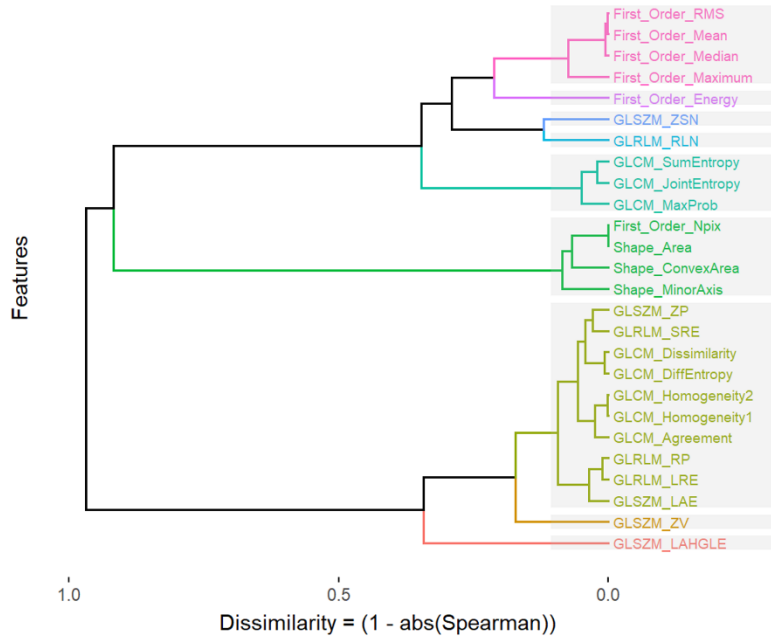

**Correlogram of Spearman's correlations**

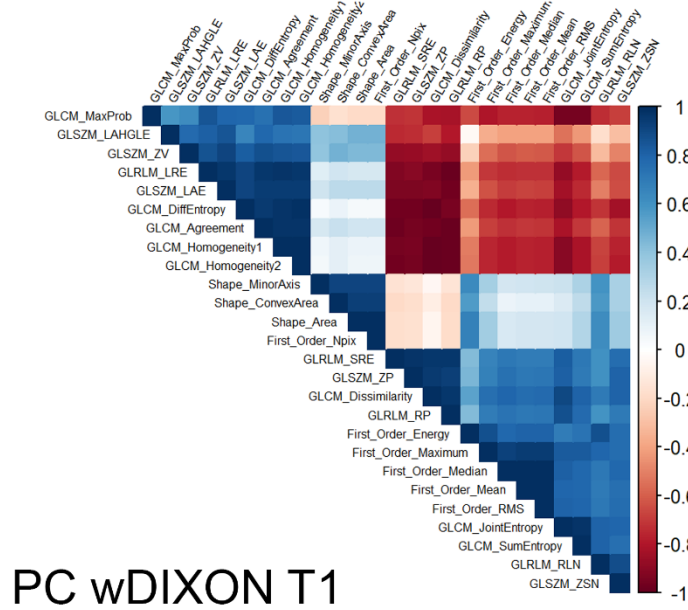

PC wDIXON T1

**Supplementary Figure 2. Dendrograms and Spearman's Correlation Matrices** showing the reproducible features and clusters for each MR sequence with the threshold values ICC 0.8 / CCC 0.9. On the dendrograms, the features are displayed in the y-axis, and the dissimilarity in the x-axis (low dissimilarity on the right and high dissimilarity on the left of the axis). Two features or clusters of features are grouped by a branch according to their dissimilarity. All features with a dissimilarity  $< 0.1$  indicating a high redundancy share the same colors and are grouped in the same grey box. All clusters with a dissimilarity  $\geq 0.1$  are considered independent. On the correlograms, the features are displayed in both x-axis and y-axis. Similarities between features compared two-by-two are color-coded in blue for a positive Spearman's correlation and in red for a negative correlation. The intensity of the correlation is represented by the intensity of the color, with higher correlations coded with darker colors and low correlations with lighter colors.

ADC map (a), T1-WI (b), ipDIXON T2-WI (c), wDIXON T2-WI (d), ipDIXON T1-WI (e), wDIXON T1-WI (f). Grey-level co-occurrence (GLCM), grey-level run-length (GLRLM), grey-level size-zone (GLSZM), neighborhood grey-tone difference.

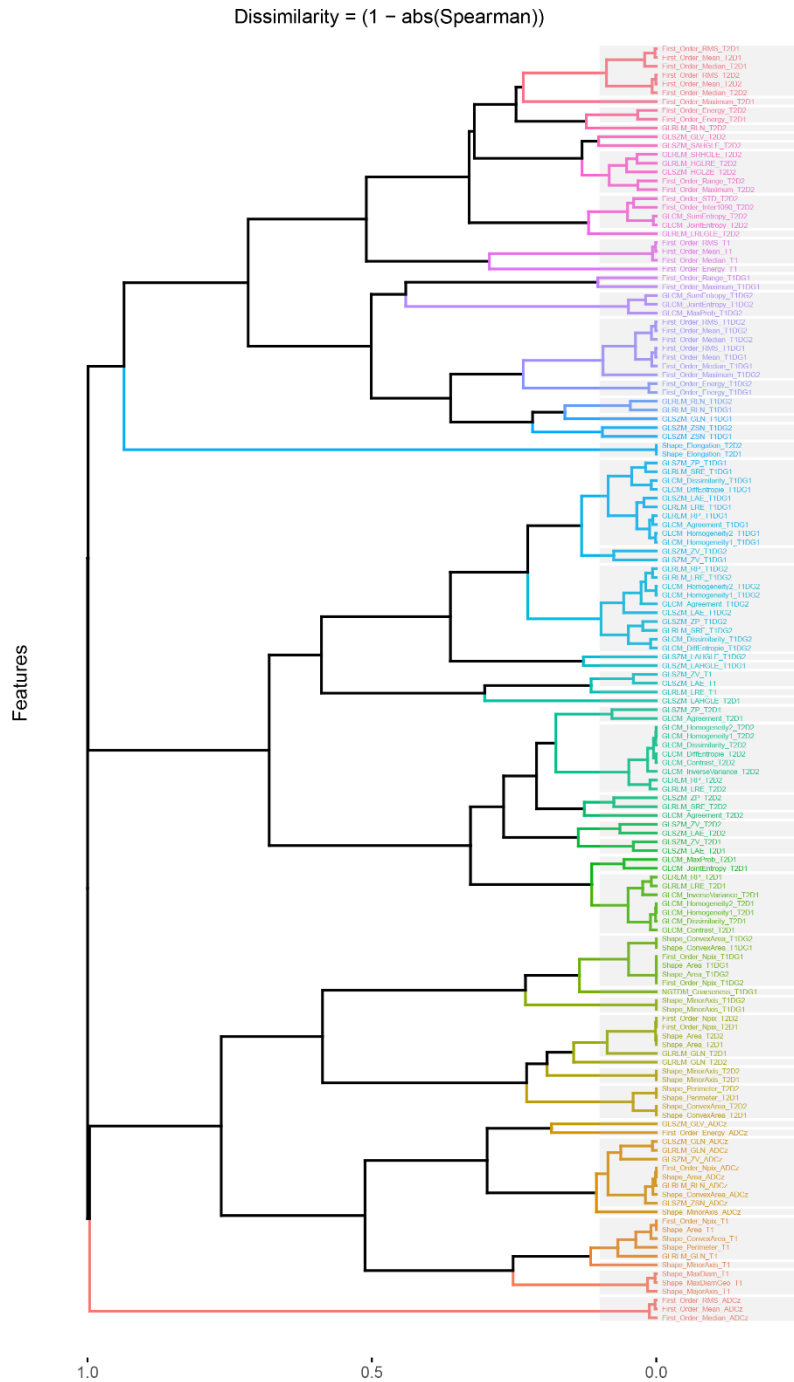

**Supplementary Figure 3. Dendrogram showing the reproducible features and clusters of multiple sequences pooled together with the threshold values ICC 0.8 / CCC 0.9.** The features are displayed in the y-axis and the dissimilarity in the x-axis (low dissimilarity on the right and high dissimilarity on the left of the axis). Two features or clusters of features are grouped by a branch according to their dissimilarity. All features with a dissimilarity < 0.1 indicating a high redundancy share the same colors and are grouped in the same grey box. All

clusters with a dissimilarity  $\geq 0.1$  are considered independent. Gray-level co-occurrence (GLCM), gray-level run-length (GLRLM), gray-level size-zone (GLSZM), neighborhood grey-tone difference (NGTDM).
